# Supplementary material
Source: publisher site journal article supplement (https://www.spandidos-publications.com/6238/downloadSupplementary)
Supplement: Supplementary file 1 [file downloadSupplementary]

## Sheet: Sheet1
Table SIV. Univariate Cox regression analysis was applied to identify glycolysis-related lncRNAs associated with overall survival, and 656 glycolysis-related prognostic lncRNAs were identified in the training set
id	HR	HR.95L	HR.95H	P-value
AC093726.2	3.67495	2.2573	5.98293	1.65741e-07
AC254562.3	0.33414	0.218503	0.510975	4.23323e-07
AC124016.1	0.604155	0.424379	0.860088	0.00516869
LINC00092	1.50815	1.16287	1.95594	0.00195193
AC013731.1	0.254083	0.0878576	0.734805	0.0114487
LINC01116	1.41896	1.11888	1.79952	0.00389437
AC073896.4	0.593027	0.363117	0.968506	0.0368133
AL355601.1	2.3752	1.45396	3.88012	0.000550885
AC254562.2	0.101831	0.0233688	0.443735	0.00235087
AL354863.1	0.561884	0.316731	0.996786	0.0487272
AC007663.4	0.285809	0.125128	0.652826	0.00295997
AL022313.4	0.635687	0.531377	0.760473	7.26342e-07
MIR924HG	3.61678	1.98184	6.60047	2.80642e-05
SNHG29	0.680668	0.473404	0.978675	0.0378651
LINC02166	2.76412	1.83929	4.15396	9.97834e-07
AC005790.1	6.61994	3.17043	13.8226	4.85886e-07
AC097639.1	0.259329	0.0912366	0.73711	0.0113336
MIR600HG	0.605259	0.376065	0.974134	0.03865
XPC-AS1	3.49627	1.21885	10.0291	0.0199095
TGFB2-AS1	1.55917	1.29781	1.87317	2.08977e-06
AC025154.2	11.9564	5.6261	25.4095	1.11023e-10
ELOA-AS1	3.31942	1.42095	7.75434	0.00557926
LINC02192	0.400689	0.164084	0.978474	0.0446713
UBL7-AS1	2.60521	1.00331	6.76473	0.049212
EDIL3-DT	0.217291	0.0639025	0.738865	0.0145004
AC009812.4	1.88168	1.06519	3.32404	0.0294434
AP001542.3	4.98572	1.75471	14.1661	0.00256698
TMEM220-AS1	3.21548	2.08434	4.96048	1.28887e-07
CRNDE	2.28645	1.84369	2.83555	5.03901e-14
AC233976.1	0.498702	0.268409	0.926587	0.0277224
NFYC-AS1	1.78281	1.03182	3.08041	0.0382437
AC109439.1	0.518166	0.363569	0.738502	0.000276112
AL592166.1	3.41723	1.14766	10.175	0.0272887
MRPL20-AS1	2.49859	1.34035	4.65771	0.0039539
AL162171.3	0.103536	0.0312781	0.34272	0.000204528
AL603832.1	45.1369	8.90021	228.909	4.24746e-06
AC060766.3	3.36903	1.80942	6.27295	0.000128299
ZNF236-DT	2.43861	1.1255	5.28371	0.0238423
LINC01736	1.22353	1.01287	1.478	0.0363808
AC020907.1	4.3647	1.92725	9.88489	0.00041082
AC023908.3	10.0267	2.1121	47.5996	0.00372204
AC008060.3	5.83829	1.67844	20.3079	0.00553382
AC023301.1	0.669183	0.5151	0.869357	0.00262543
AL355974.2	1.9056	1.51233	2.40114	4.56484e-08
AC093726.1	2.68211	1.96821	3.65497	4.15136e-10
AC023282.1	0.455803	0.234108	0.887437	0.0208191
AC022007.1	4.29758	2.16188	8.54314	3.19271e-05
AC012213.4	0.553773	0.403395	0.76021	0.000256268
AC010624.3	3.12313	1.52242	6.40687	0.00189361
AP001972.1	0.319846	0.115239	0.887731	0.0286255
RUNDC3A-AS1	0.174075	0.0703735	0.430588	0.000154669
AC010319.4	3.97851	1.59582	9.91874	0.00304906
TTC28-AS1	0.26805	0.126785	0.566717	0.000567595
AC011005.4	2.76803	1.31398	5.83111	0.00740024
AC018635.2	0.348341	0.155012	0.782786	0.0106869
AC083867.2	0.451647	0.266792	0.764584	0.00308304
LINC01765	1.80372	1.27087	2.56	0.000961112
NRIR	3.2046	2.09954	4.89129	6.74733e-08
AC026691.1	0.451894	0.26433	0.772548	0.00369406
AL021707.2	0.33631	0.13262	0.852847	0.0217201
AL022318.1	0.0827579	0.00758384	0.903087	0.0409968
LIPE-AS1	3.04504	1.02405	9.05452	0.0452084
NFE2L1-DT	0.251634	0.070966	0.892253	0.0326393
LINC00578	1.79029	1.00705	3.18272	0.0472687
AL117339.3	0.0931703	0.0206056	0.421279	0.00205015
AC095032.1	0.159866	0.0306765	0.833116	0.0295002
AL731577.2	0.260709	0.122132	0.556526	0.000511461
EPB41L4A-AS1	0.528534	0.370227	0.754531	0.000446953
CSGALNACT2-DT	0.161233	0.0579435	0.448645	0.000474014
AC061992.2	3.26879	1.94684	5.48837	7.47631e-06
AL117336.2	0.458376	0.233769	0.898784	0.0231725
LINC00880	1.97778	1.19752	3.26645	0.0077196
AC022211.2	0.341904	0.15204	0.768869	0.00944139
POC1B-AS1	28.2284	4.61053	172.831	0.000302535
AC093802.1	0.059055	0.00971502	0.35898	0.00212251
LYPLAL1-DT	0.33883	0.142118	0.807821	0.0146307
ARPP21-AS1	0.322869	0.140183	0.743633	0.00791149
AL359091.1	0.640633	0.504096	0.81415	0.000271305
FAM66C	0.356254	0.188008	0.675063	0.0015512
SMC5-AS1	6.03695	1.72599	21.1153	0.00488797
AC080013.2	0.294112	0.108459	0.797556	0.0161997
C5orf67	11.3974	4.12328	31.5044	2.72099e-06
AC025171.3	3.84032	2.15819	6.83353	4.73312e-06
ZNF529-AS1	2.07113	1.17731	3.64357	0.011526
CA3-AS1	3.05492	2.04327	4.56745	5.26711e-08
APTR	2.28908	1.16815	4.48563	0.0158319
LINC00886	3.3913	2.08482	5.5165	8.67198e-07
ARHGEF26-AS1	0.594305	0.393327	0.897974	0.0134746
PLBD1-AS1	5.24131	3.09846	8.86614	6.55086e-10
AC012073.1	3.51676	2.23784	5.52657	4.96315e-08
AC145098.1	3.00577	1.66555	5.42443	0.000258593
LINC02043	0.219028	0.0661435	0.725293	0.0129297
AC107464.2	1.63935	1.09264	2.4596	0.0169402
NUP153-AS1	5.31799	1.56304	18.0936	0.00747579
LINC01778	2.4723	1.55562	3.92916	0.000128466
LINC01719	0.45955	0.227527	0.928178	0.0301765
AL121890.5	0.492085	0.262455	0.922622	0.0270301
AL391807.1	0.651986	0.482879	0.880315	0.00523714
AC012213.1	0.588325	0.394742	0.87684	0.00917397
AC002480.1	9.18699	2.80401	30.1	0.000249472
AC046143.2	1.81696	1.02713	3.21415	0.0401747
AL662884.1	6.75376	1.05735	43.1391	0.0434966
AL158212.3	0.248825	0.129894	0.476651	2.73931e-05
AL450998.2	6.07048	1.27921	28.8074	0.023214
NRAV	3.35166	2.12849	5.27775	1.78111e-07
AL135925.1	0.439555	0.215069	0.898354	0.0242039
ZNF474-AS1	2.1317	1.48936	3.05107	3.51381e-05
AGBL5-IT1	0.541146	0.31339	0.934424	0.0275718
PSMB8-AS1	2.0756	1.42345	3.02654	0.000147775
STARD7-AS1	5.86666	1.89208	18.1904	0.00218087
AF111167.2	0.356301	0.14009	0.906204	0.0302535
AC106886.3	0.303643	0.113636	0.811353	0.0174612
AL137060.3	6.59145	1.3845	31.3811	0.0178555
LINC00320	0.745245	0.558176	0.995009	0.0461639
AC022034.1	3.06064	2.21019	4.23833	1.64227e-11
AC114956.2	7.91353	1.9791	31.6426	0.00344068
AC009495.3	2.54916	1.61654	4.01985	5.65712e-05
SBF2-AS1	3.34747	1.55474	7.20735	0.00201626
LINC01285	4.6098	1.47618	14.3955	0.00853127
AC122707.1	0.624995	0.460561	0.848136	0.00254953
AC128687.2	4.03182	1.48381	10.9553	0.00626281
AC018816.1	41.4558	9.93922	172.909	3.19371e-07
AP001486.2	0.313074	0.180888	0.541857	3.33522e-05
AC069224.1	0.443724	0.234918	0.838124	0.0122731
LINC01995	5.28113	2.72624	10.2304	8.10622e-07
AC010255.1	2.53075	1.7273	3.70793	1.8925e-06
LINC01273	4.44736	2.2088	8.95464	2.92502e-05
EMX2OS	0.726199	0.550117	0.958641	0.0239404
RHOQ-AS1	29.0364	7.45242	113.132	1.20661e-06
AL391834.2	0.586324	0.389258	0.883156	0.0106347
AL731569.1	0.244869	0.0918393	0.65289	0.00492276
AC004448.2	0.0934643	0.010004	0.873206	0.0376279
Z99716.1	0.156869	0.0300826	0.818015	0.0279233
AL121895.2	4.83681	1.41109	16.5791	0.0121466
AL162258.2	7.45526	2.65206	20.9577	0.000139263
AC027237.3	8.51049	3.28848	22.0249	1.01617e-05
ZNF710-AS1	0.577194	0.393174	0.847343	0.00502203
MIR4435-2HG	2.15689	1.55756	2.98682	3.69568e-06
AL121899.1	1.41786	1.00044	2.00946	0.0497131
AL135999.3	0.204783	0.0713414	0.587822	0.00320295
AC025287.2	0.274666	0.0943626	0.799482	0.017764
SNHG19	0.718634	0.54585	0.946112	0.0185347
AP006333.2	0.386059	0.230045	0.647881	0.000314345
AL159169.2	0.407119	0.242035	0.684801	0.000706597
LINC00928	0.65771	0.445044	0.972	0.035512
AC010654.1	0.208585	0.0630872	0.689645	0.0101998
AC126118.1	0.543825	0.298347	0.991281	0.0467504
PCOLCE-AS1	4.84801	1.39772	16.8154	0.0128594
PRECSIT	4.47724	2.05455	9.75673	0.000162115
TUBA3FP	0.225797	0.0815464	0.625219	0.00418619
LINC00664	3.38632	1.34997	8.4944	0.00933628
SLCO4A1-AS1	1.36264	1.04742	1.77271	0.0211581
AC009955.4	0.483423	0.26313	0.888144	0.0191703
NUTM2B-AS1	0.076783	0.00796203	0.740469	0.0264309
AC009754.1	0.0907844	0.0138508	0.595041	0.0123798
AL450384.2	0.521245	0.30962	0.877517	0.0142219
AC027796.4	1.96982	1.01501	3.82281	0.0450692
CNIH3-AS2	1.64828	1.12186	2.42174	0.0109053
AC000068.1	0.394291	0.161148	0.964735	0.0414894
LINC00601	3.43536	2.07983	5.67437	1.43591e-06
AL513534.2	0.401443	0.219802	0.73319	0.00297974
AL589765.1	0.488137	0.262267	0.90853	0.0236597
FAM198B-AS1	4.8436	2.33667	10.0401	2.21497e-05
TRAF3IP2-AS1	0.44858	0.241941	0.831707	0.010929
AC006033.2	25.5074	4.27643	152.143	0.000378332
AL160006.1	1.88068	1.01469	3.48575	0.0448245
AC135050.6	2.70078	1.34782	5.41183	0.00508379
AP002807.1	4.91781	2.05048	11.7947	0.000358602
AC004801.6	5.10037	1.24783	20.8473	0.0233179
AP001267.2	0.0696102	0.010988	0.440987	0.00466646
AL449403.1	0.340893	0.128366	0.905282	0.0307994
HHLA3	1.73964	1.10142	2.74768	0.0175874
AC005487.1	2.58952	1.32928	5.04454	0.00516478
BX322234.1	2.94473	1.6484	5.26052	0.000263957
SLC25A21-AS1	0.394754	0.276821	0.56293	2.84686e-07
MZF1-AS1	2.58781	1.24443	5.3814	0.010916
ZNF433-AS1	7.4256	1.47801	37.3066	0.014919
AC009019.1	0.129918	0.0242469	0.69612	0.0171764
AC004921.1	4.10553	1.90603	8.84316	0.000309077
AC022400.1	0.589237	0.354268	0.980051	0.0415909
FOXD3-AS1	1.62909	1.29551	2.04857	2.98423e-05
AC093689.1	2.48324	1.18089	5.22189	0.0164679
AL645924.1	1.49548	1.10707	2.02015	0.00871811
EDRF1-DT	0.0326088	0.00664926	0.159918	2.44871e-05
AL162426.1	0.207529	0.0802612	0.536601	0.00117748
AL512353.1	6.04712	1.93577	18.8905	0.0019584
LINC01426	8.77854	3.44134	22.3932	5.45205e-06
AL357033.4	9.76046	2.24629	42.4108	0.00236837
SNHG9	1.44969	1.06736	1.96899	0.0174412
AC007292.1	0.528673	0.310398	0.90044	0.0189784
LINC01102	0.652076	0.461121	0.922106	0.0155771
LINC01224	2.0021	1.28349	3.12307	0.00221213
AL023803.1	1.62127	1.02002	2.57692	0.0409723
BASP1-AS1	0.234344	0.104166	0.527209	0.000452483
AC098851.1	9.10628	4.99368	16.6059	5.74844e-13
NEAT1	1.40451	1.08951	1.81057	0.00875178
AL358154.1	2.69014	1.26556	5.71827	0.0101081
LINC01775	6.84459	2.83396	16.5311	1.90866e-05
LINC01831	3.99611	2.68135	5.95555	1.011e-11
AL157392.3	0.178135	0.0711869	0.445759	0.000227393
LAMC1-AS1	7.38335	2.44594	22.2875	0.000390055
EGFR-AS1	3.62008	1.93759	6.76356	5.48259e-05
AC025162.2	0.39451	0.198952	0.782291	0.00774671
AL356215.1	1.95485	1.0711	3.56777	0.0289833
AC022182.2	2.17272	1.17924	4.00316	0.0128191
LINC00994	0.0145151	0.00134401	0.15676	0.000489807
AL445524.1	6.69139	2.912	15.376	7.53781e-06
SNHG31	9.36936	3.50366	25.0552	8.26252e-06
AP000757.1	0.395263	0.252305	0.619223	5.06615e-05
AL133415.1	1.8689	1.22273	2.85654	0.00386541
AC080038.1	2.12183	1.39302	3.23195	0.000458567
AL391834.1	0.580397	0.409544	0.822525	0.00222644
AC011346.1	0.218121	0.0850737	0.559242	0.00152555
AC006058.1	0.68962	0.508718	0.934851	0.016668
AL353658.1	0.312161	0.105713	0.92178	0.0350834
AC008556.1	2.77467	1.29756	5.93329	0.00849596
AL355916.2	0.737831	0.616792	0.882623	0.000882016
BCDIN3D-AS1	0.15395	0.045173	0.524666	0.00278081
AC004492.1	2.45861	1.18485	5.1017	0.0157189
AC127502.2	4.47243	2.0637	9.69262	0.000147094
AP001972.3	0.175717	0.0434004	0.711429	0.0148027
PINK1-AS	2.2756	1.10988	4.66567	0.0247964
AC093388.1	3.55198	1.3623	9.26124	0.00953421
Z68871.1	2.29877	1.14882	4.59977	0.0186735
HAR1A	0.46355	0.300039	0.71617	0.000531983
AC073389.1	0.341074	0.149409	0.778609	0.0106438
AC008443.4	0.576062	0.36172	0.917415	0.0201788
AC012313.3	8.67332	1.54078	48.8238	0.0142741
AC015849.3	2.11543	1.22039	3.66689	0.00759368
AP002761.4	3.73622	1.5127	9.22814	0.00427466
AL138921.2	0.404598	0.197552	0.828641	0.013366
AL021368.1	0.224645	0.0725207	0.695874	0.00963941
AC008610.1	0.682829	0.475459	0.980642	0.0388464
AC092718.3	2.24502	1.68096	2.99834	4.3009e-08
AC073389.3	0.335259	0.191362	0.58736	0.000133507
AL031666.1	5.53205	2.80118	10.9253	8.3679e-07
AC004943.1	5.74345	1.60777	20.5173	0.00712505
AP004609.3	0.470698	0.262925	0.842662	0.0112087
ELN-AS1	1.78076	1.18066	2.68589	0.00592389
AC097468.2	0.262547	0.113067	0.609645	0.00186261
AC120036.4	0.265922	0.167051	0.42331	2.34856e-08
LINC01497	1.93615	1.33993	2.79767	0.000434661
AC022893.2	0.352187	0.141197	0.878458	0.0252311
AC025171.5	3.30406	2.20486	4.95126	6.99089e-09
AC020907.4	2.17171	1.00456	4.69493	0.0486628
ZBTB20-AS4	0.351714	0.189413	0.653084	0.000935551
AL139246.5	0.613712	0.43124	0.873392	0.00669022
LINC00882	0.197816	0.0933832	0.41904	2.32579e-05
AC000068.2	0.418261	0.241165	0.725406	0.00191791
AL604028.1	2.58416	1.47517	4.52688	0.00090304
LYRM4-AS1	14.8237	6.2621	35.0907	8.64652e-10
AC021078.1	2.31556	1.11813	4.79533	0.0237848
PRKAR1B-AS1	2.34107	1.53183	3.57783	8.47224e-05
AC099518.1	2.88357	1.00975	8.23469	0.0479196
SNHG8	0.671295	0.471465	0.955822	0.027065
AL137025.1	0.427429	0.212607	0.85931	0.0170553
AC020915.2	4.69473	2.06886	10.6534	0.000216609
AC007250.1	3.79293	1.55935	9.22583	0.00328654
SUGT1P4-STRA6LP	43.2543	9.79546	191	6.64798e-07
AC084125.2	0.484934	0.241434	0.974018	0.0419571
LINC02440	0.566159	0.419472	0.764143	0.000200723
AC087752.4	0.457744	0.222069	0.943534	0.0342209
AL118558.3	0.35174	0.199207	0.621068	0.000315816
CD44-AS1	4.17262	1.45024	12.0054	0.00806435
AC087501.4	4.60771	2.1205	10.0122	0.000114202
AC135782.1	0.339055	0.159454	0.720947	0.00495395
LINC02611	2.86774	1.06267	7.7389	0.0375278
LBX2-AS1	2.33945	1.24216	4.40605	0.00850475
UST-AS2	1.44829	1.09929	1.90809	0.00846659
AL135999.2	0.115302	0.0290689	0.457348	0.00212092
AL359921.2	1.74309	1.06304	2.8582	0.0276487
HOXD-AS2	1.96075	1.35405	2.83928	0.00036444
AL441992.1	2.34539	1.30143	4.22675	0.00455819
AC099850.3	1.99041	1.49276	2.65396	2.74421e-06
AL035461.2	2.18027	1.50742	3.15344	3.47974e-05
FZD4-DT	3.77114	1.20223	11.8293	0.0228624
BHLHE40-AS1	3.34407	1.10088	10.1581	0.0332128
AL355578.1	0.0838853	0.0153937	0.45712	0.00417167
CYTOR	2.34998	1.74308	3.16817	2.0779e-08
LNCOG	3.39781	1.56483	7.37786	0.001989
AC148477.1	0.658493	0.43762	0.990846	0.0450618
LOXL1-AS1	3.62014	1.79517	7.30041	0.000324519
LINC02371	0.305548	0.11681	0.799242	0.0156605
AL121894.2	1.91555	1.48885	2.46455	4.29393e-07
LINC02777	2.33398	1.44783	3.76249	0.000503394
AC087442.1	0.521145	0.289833	0.937065	0.0294725
AC100793.3	0.430436	0.193495	0.957521	0.0387935
AC104574.2	9.76668	3.1017	30.7535	9.85377e-05
AC011444.3	0.440703	0.248163	0.782624	0.00516637
AC015540.1	0.588003	0.433105	0.798299	0.00066399
AC009812.1	0.567133	0.335756	0.957956	0.0339586
AC074286.1	0.413842	0.26633	0.643055	8.73124e-05
AC074138.1	5.93835	1.70022	20.7408	0.00524263
BCRP3	0.253773	0.0985253	0.653648	0.00450056
OGFR-AS1	3.24403	1.09241	9.63352	0.0340804
AC010487.1	10.3935	2.11052	51.1842	0.00399901
AC110285.1	0.621852	0.470232	0.822361	0.000863686
HOXB-AS1	1.92661	1.2505	2.96828	0.00294287
AC000123.1	4.11999	1.9183	8.84862	0.00028312
AC103923.1	1.89606	1.19512	3.00811	0.00658943
AC002456.1	2.26456	1.57408	3.25791	1.05919e-05
AC008124.1	0.561286	0.318208	0.99005	0.0460977
AC008760.2	1.91348	1.367	2.67843	0.000155642
AL121827.1	0.157853	0.0434828	0.573042	0.0050099
LINC01089	0.653498	0.457061	0.934359	0.0196918
AC142472.1	0.402378	0.185075	0.874823	0.0215923
PHEX-AS1	8.0219	2.70095	23.8253	0.000177585
AC009227.1	0.349862	0.211255	0.579411	4.49823e-05
GAS1RR	8.03926	1.91392	33.7683	0.00442057
LINC01785	0.516019	0.280985	0.947649	0.0328962
AC022613.1	2.95635	1.76498	4.95189	3.80938e-05
AL133330.1	5.18488	2.44617	10.9898	1.75629e-05
AC008738.2	0.113515	0.0171968	0.749299	0.0238394
AL138921.1	0.205159	0.0454059	0.926977	0.0395415
WDFY3-AS2	0.467698	0.301378	0.725803	0.000700763
AL133215.2	5.41391	2.48509	11.7946	2.12551e-05
LINC01586	0.122628	0.0232499	0.646779	0.013377
AC015922.3	1.58337	1.18234	2.12044	0.00204269
AC093010.2	0.72305	0.549305	0.95175	0.0207419
MAPT-IT1	0.121742	0.0291649	0.508187	0.00387182
AC026471.1	0.313241	0.118991	0.824601	0.0187493
ZNF674-AS1	1.77878	1.0046	3.14958	0.0481873
AC008738.4	1.86051	1.36247	2.54061	9.39391e-05
ZNF346-IT1	0.235882	0.0634344	0.877133	0.0311143
AC004067.1	2.82181	1.82251	4.36905	3.30451e-06
ERVK9-11	27.9837	9.54371	82.0528	1.27823e-09
DNM3OS	62.6393	2.74728	1428.2	0.00950191
LINC01166	0.22336	0.0521546	0.95657	0.0434049
MAP4K3-DT	0.154077	0.0471069	0.503952	0.00197901
AC002451.1	0.447207	0.232223	0.861218	0.0160923
AP006545.2	0.341112	0.158599	0.733658	0.00591242
AC023983.1	26.1936	7.10373	96.5836	9.35065e-07
LINC02636	0.199571	0.0967372	0.41172	1.29038e-05
EGILA	1.86224	1.23153	2.81594	0.00320819
DRAIC	0.249265	0.114345	0.543384	0.00047587
LINC00665	2.59409	1.42415	4.72515	0.00183569
ST7-AS2	2.04635	1.15173	3.63589	0.0146206
AC002116.2	11.0553	3.11197	39.2742	0.000203025
L3MBTL4-AS1	3.47325	1.35334	8.91382	0.00962058
AL121890.3	0.0950496	0.0187319	0.482302	0.00451271
DNAJC3-DT	0.36757	0.208128	0.649158	0.000562838
AP002840.2	3.118	1.94693	4.99347	2.2146e-06
AC012676.1	3.08157	1.175	8.08176	0.02215
AF106564.1	0.414266	0.250771	0.684355	0.000579837
AC010624.1	1.99464	1.17164	3.39577	0.0109759
AC023043.3	6.28614	2.391	16.5268	0.000193416
AL590096.1	0.479361	0.235883	0.974156	0.0421197
DNMBP-AS1	0.532313	0.323093	0.877013	0.0133191
LINC02600	0.210563	0.0881189	0.503146	0.00045587
AL136964.1	0.204817	0.0975012	0.430251	2.82685e-05
AL662844.4	0.446824	0.250448	0.797177	0.00638342
NDUFA6-DT	0.152426	0.0592604	0.39206	9.5201e-05
WAKMAR2	21.3024	6.10809	74.2937	1.5931e-06
AC015967.1	0.351093	0.185634	0.66403	0.0012856
AC145207.1	0.255513	0.0787807	0.828717	0.0230307
AP000223.1	0.442334	0.249927	0.782868	0.00510453
SILC1	0.618532	0.463557	0.825318	0.00109615
TOB1-AS1	0.346073	0.167585	0.714661	0.0041312
AC004112.1	2.57947	1.05984	6.27795	0.0367944
BTF3-DT	0.446173	0.241598	0.823975	0.00992079
AL157871.2	4.06183	1.63608	10.0841	0.00251885
TMCC1-AS1	0.48881	0.269846	0.885447	0.01821
AC009955.2	7.62114	3.56381	16.2977	1.63299e-07
ASIC4-AS1	0.661743	0.556353	0.787096	3.08872e-06
AC107021.2	3.98298	1.27266	12.4653	0.0175888
AC108673.3	0.73324	0.554773	0.96912	0.029229
AC025171.1	3.07679	1.66737	5.67757	0.000323684
AC010536.3	0.470127	0.236123	0.936033	0.0317054
AC007728.2	3.00465	1.07839	8.37168	0.0353506
AC013391.3	0.602769	0.461971	0.786478	0.000191822
AC007375.3	0.254145	0.100047	0.645592	0.00397756
DNAJC9-AS1	0.310261	0.145617	0.661062	0.002426
AL049775.1	0.37632	0.161117	0.878968	0.023944
LINC00237	0.621861	0.462039	0.836965	0.00172336
LINC01503	2.06286	1.35937	3.13042	0.000667118
AL121895.1	0.301943	0.106157	0.858816	0.0247463
LINC02559	0.647198	0.419597	0.998255	0.0490836
AC110597.1	1.78776	1.00414	3.18291	0.0483825
PAXBP1-AS1	0.294256	0.142883	0.605998	0.000903843
AL160412.1	2.5783	1.36897	4.85595	0.00336494
LINC02869	2.86892	2.07271	3.97097	2.0918e-10
AC079414.3	0.526144	0.297279	0.931204	0.0274777
USP2-AS1	5.00654	2.20522	11.3664	0.000117927
LINC00158	0.0764085	0.0130591	0.447066	0.00432915
AC008014.1	0.150659	0.0590198	0.384583	7.54168e-05
AL596087.2	2.35053	1.61864	3.41336	7.11725e-06
TDRKH-AS1	0.315072	0.15288	0.649337	0.00174636
FLJ20021	0.484413	0.304814	0.769832	0.00216415
AC004233.2	0.44606	0.287425	0.692248	0.000317898
DLGAP1-AS1	2.41463	1.63862	3.55815	8.32654e-06
SOX1-OT	0.653133	0.490817	0.869127	0.00347582
LINC02716	0.395618	0.260064	0.601827	1.47568e-05
IDH2-DT	0.57033	0.383416	0.848363	0.00557751
LINC00941	7.35404	3.78679	14.2817	3.81854e-09
LNCSRLR	10.809	1.62309	71.9831	0.0138697
AC012313.5	3.57113	1.61067	7.91782	0.00172877
LINC02447	8.9489	1.8313	43.7301	0.00678106
AC007098.1	4.99737	3.22287	7.74892	6.52473e-13
AC006480.2	3.59897	1.16845	11.0852	0.0256679
DGCR5	0.302299	0.195772	0.46679	6.77799e-08
AC073525.1	0.186566	0.039908	0.872176	0.0328612
AC007637.1	9.75341	3.76503	25.2665	2.73464e-06
LINC00488	2.69899	1.44428	5.04374	0.00185649
AL008726.1	3.26101	1.53033	6.94894	0.0021968
MIR23AHG	1.47937	1.11212	1.96789	0.00714784
AC005165.1	2.13214	1.52089	2.98904	1.1201e-05
FAM53B-AS1	4.97978	1.3211	18.7709	0.0177269
AC092720.2	0.457008	0.265405	0.786936	0.00474102
AL353597.1	0.294113	0.141562	0.611057	0.00103726
AL139352.1	0.470385	0.240016	0.921863	0.0280235
AC005674.1	2.13066	1.07038	4.24121	0.031271
LINC01521	0.433314	0.252005	0.745068	0.00249374
AL139011.1	2.26059	1.08106	4.72706	0.0302303
OTUD6B-AS1	0.304117	0.142652	0.648342	0.00205671
AC004943.2	3.50938	1.92102	6.41108	4.43763e-05
AC015961.1	0.215621	0.064952	0.715797	0.0122061
AL445493.3	0.19317	0.0627938	0.594243	0.00413398
AC079684.1	4.65805	1.81666	11.9436	0.00136177
AL121583.1	0.369721	0.150637	0.907439	0.0298567
AC015908.3	3.0425	1.95381	4.73782	8.4809e-07
BX537318.1	2.38065	1.14339	4.95677	0.0204459
LINC02308	2.54019	1.787	3.61085	2.0454e-07
AL592424.1	0.183437	0.0745532	0.451342	0.000222727
KDM4A-AS1	3.3255	1.04819	10.5506	0.0413648
DPP10-AS1	0.629647	0.439696	0.901659	0.0115696
AC096677.1	2.98633	1.55042	5.75211	0.00107121
LINC02449	0.262074	0.139026	0.494029	3.47253e-05
LINC00844	0.608703	0.497514	0.744741	1.40909e-06
AC011450.1	6.66728	3.00205	14.8074	3.15881e-06
AL133163.3	0.397052	0.203709	0.773899	0.0066735
SIX3-AS1	5.53886	2.34963	13.057	9.13686e-05
AL138955.1	0.199276	0.0677971	0.585734	0.00336444
GDNF-AS1	0.424953	0.270418	0.667798	0.000206638
AL365259.1	0.425509	0.236693	0.764949	0.00429894
AP001269.2	4.43349	2.62807	7.47919	2.38525e-08
AL590004.3	1.92495	1.20429	3.07689	0.00620469
LINC02668	0.423048	0.216756	0.82567	0.0116882
AC008393.1	0.460772	0.236799	0.896584	0.0225265
AC125616.1	0.429469	0.249678	0.738726	0.002256
AC145423.2	3.78131	1.30637	10.9451	0.0141748
BX293535.1	0.623371	0.428268	0.907354	0.0136033
CNIH3-AS1	1.4379	1.0231	2.02087	0.0364836
WWTR1-AS1	5.90223	2.92197	11.9222	7.4555e-07
AL450311.1	0.588835	0.402861	0.860661	0.00624142
LINC01278	0.498088	0.250747	0.989411	0.0465508
LINC01150	1.66181	1.09195	2.52907	0.0177634
TMEM92-AS1	2.99792	1.11537	8.0579	0.0295257
AC092802.1	5.48135	2.03116	14.7921	0.000782365
LINC01270	25.4278	7.07495	91.3888	7.13775e-07
AP002026.1	6.71384	1.54008	29.2684	0.0112507
AC011899.2	5.4776	1.41286	21.2364	0.0138988
AC108488.1	2.83393	1.23659	6.49459	0.0138224
AC007485.1	14.8337	6.35504	34.6244	4.49401e-10
AL513217.1	0.497389	0.326412	0.757925	0.00115533
DICER1-AS1	0.358944	0.211758	0.608433	0.000141609
AC022558.3	0.319938	0.102777	0.995946	0.0491861
AC017083.1	0.450788	0.223993	0.907215	0.0255586
AC092675.1	1.78231	1.21468	2.6152	0.00313593
AC005899.7	0.371965	0.146009	0.947602	0.0381939
AL136295.6	0.455071	0.2375	0.871956	0.0176475
AC011447.3	5.96683	1.77455	20.0631	0.00388985
AC005261.3	1.75116	1.05663	2.9022	0.0297288
AC026333.4	2.19048	1.13059	4.24398	0.0201419
AC131097.3	2.27987	1.5595	3.33298	2.10533e-05
AC090692.1	1.54068	1.22527	1.93728	0.000217025
AC118755.1	0.37756	0.143655	0.992319	0.0481998
SNAI3-AS1	0.243164	0.114887	0.514671	0.000218795
LINC02798	2.38224	1.36616	4.15403	0.0022152
AC015987.1	4.4186	1.91796	10.1796	0.000484009
PTCHD1-AS	18.26	5.67737	58.7292	1.09738e-06
LINC01023	1.74277	1.28324	2.36684	0.000375262
AL391840.1	0.51844	0.329926	0.814667	0.00438747
LINC00299	3.90817	1.88477	8.10377	0.000248905
AL162231.2	2.2424	1.48615	3.38348	0.000119245
PVT1	4.5354	2.41444	8.51951	2.59767e-06
LINC02730	2.12176	1.15877	3.88503	0.0147918
HCG21	4.23663	2.26276	7.93238	6.42789e-06
ZNF213-AS1	0.422452	0.231552	0.770738	0.00497248
AL021937.4	3.40836	1.20871	9.61105	0.0204314
AC024270.3	0.19587	0.0662854	0.578786	0.00318662
AL035530.2	0.111786	0.0490256	0.254889	1.88465e-07
AL021368.3	0.559808	0.349089	0.897722	0.0160516
AP000721.2	0.414704	0.217347	0.791266	0.00758038
CEROX1	0.607028	0.497594	0.740529	8.58191e-07
SNHG21	0.305688	0.149334	0.625744	0.00118441
AC010624.2	0.257643	0.119924	0.553515	0.000509156
B3GALT5-AS1	1.64797	1.05998	2.56214	0.0265093
HCP5	1.52806	1.15876	2.01507	0.00266582
FAM87B	3.74386	1.96578	7.13024	5.91327e-05
AC233728.1	1.76755	1.07634	2.90262	0.0244066
ZNF32-AS1	0.440392	0.215392	0.900429	0.024615
AL049648.1	11.1354	3.66425	33.8395	2.13876e-05
AL731567.1	2.91622	1.34191	6.33748	0.00688035
GUSBP11	0.0866498	0.0121869	0.616089	0.0145277
AC005899.6	0.415438	0.243402	0.70907	0.00128026
C20orf197	4.01119	1.0342	15.5576	0.0445805
AC091057.1	1.90538	1.30969	2.772	0.000750438
LINC00900	3.00571	1.4889	6.06777	0.00213687
LINC02156	3.21928	1.11535	9.29194	0.0306321
LINC00294	0.414214	0.250041	0.686183	0.000620875
AC060766.6	3.65635	1.71937	7.77546	0.000757716
AC005544.1	0.484419	0.251357	0.93358	0.0303659
AC027348.1	0.52409	0.285971	0.960483	0.0365805
AC004233.1	0.205694	0.0633968	0.667387	0.00845431
AC015922.2	1.70277	1.27514	2.27382	0.000309581
POLR2J4	4.84681	2.31871	10.1313	2.72164e-05
AC112220.2	7.37629	3.31435	16.4164	9.79987e-07
LINC01571	3.96821	2.54754	6.18113	1.09098e-09
AP006545.1	0.18298	0.0490659	0.682382	0.0114374
DLEU2	2.44582	1.01251	5.90812	0.0468572
AC008080.4	1.31973	1.0724	1.62409	0.00878926
AC002310.1	0.416238	0.192906	0.898126	0.0254969
LINC01127	9.80778	3.05659	31.4705	0.000123906
PPIC-AS1	21.9156	8.03927	59.7436	1.60412e-09
RPARP-AS1	0.168477	0.0824646	0.344204	1.02985e-06
AC026401.3	1.81979	1.44537	2.29121	3.50426e-07
AC011374.1	0.317099	0.100842	0.997118	0.0494257
AC121493.1	0.604575	0.38334	0.95349	0.0303994
AP006333.1	0.14244	0.0360187	0.563296	0.00546678
LINC02773	2.94889	1.05166	8.26878	0.0398096
HDAC2-AS2	0.128119	0.0216317	0.758812	0.0235695
FAM181A-AS1	2.8267	1.91786	4.16622	1.51789e-07
C5orf64-AS1	0.238589	0.0837294	0.679863	0.0073142
AL161645.1	0.070186	0.00875494	0.562662	0.0123684
KLHDC7B-DT	7.04631	2.15898	22.9972	0.0012155
MIR124-2HG	0.665403	0.477156	0.927919	0.0163558
DLEU2L	8.9501	1.91939	41.7342	0.00527141
AL354892.2	0.482343	0.330327	0.704316	0.000160178
PPFIA2-AS1	0.189502	0.0448425	0.80083	0.0236969
C10orf55	5.1397	1.96244	13.4611	0.000861029
CHROMR	2.05485	1.16144	3.63548	0.0133572
AC092301.1	9.43373	1.44517	61.5813	0.0190446
BAALC-AS1	1.53839	1.09069	2.16986	0.0141018
TPRG1-AS1	4.81449	2.07901	11.1492	0.000244244
AP000662.1	0.221756	0.0716734	0.686112	0.00895727
AC083862.1	4.61146	1.96775	10.807	0.000435253
AC064875.1	1.8563	1.47802	2.33139	1.03563e-07
AC016065.1	0.45759	0.21954	0.95376	0.036951
AL031058.1	3.46575	1.39838	8.58956	0.00727353
AC010168.2	8.73867	1.19053	64.1431	0.0330528
AC025176.1	2.56188	1.65099	3.97534	2.71034e-05
AL008718.2	0.143618	0.0460908	0.447508	0.000818191
AC005696.4	0.555614	0.434238	0.710915	2.96631e-06
AL365205.4	0.449625	0.266117	0.759676	0.00281619
AL138960.1	0.470348	0.300184	0.736972	0.000994736
AC010754.1	3.07142	1.90749	4.94557	3.89157e-06
AL450306.1	0.064149	0.0120029	0.342843	0.0013192
ZFHX2-AS1	0.148667	0.0579832	0.381176	7.25756e-05
HCFC1-AS1	1.77894	1.04745	3.02125	0.0330457
AL136295.7	0.459109	0.27567	0.764613	0.00277866
Z94057.1	0.337012	0.149463	0.759901	0.00874597
AL022324.3	0.148124	0.0325481	0.674098	0.0135088
FOXD2-AS1	1.76318	1.24128	2.5045	0.00154025
MIR155HG	3.95748	2.40609	6.50917	6.01895e-08
INSIG1-DT	0.610301	0.395791	0.941071	0.0254276
AP002360.1	0.476216	0.296402	0.765115	0.00216471
AP005329.2	5.11192	1.34606	19.4135	0.0165537
AL158835.2	0.352908	0.16445	0.757337	0.00750913
GAS6-AS1	3.79459	1.23679	11.6422	0.0197262
AP4B1-AS1	5.7179	1.27307	25.6815	0.0229077
AP001469.3	0.340714	0.196114	0.591934	0.000133123
ZIM2-AS1	1.91543	1.2599	2.91205	0.00235892
LINC01871	3.76298	2.0163	7.02278	3.14376e-05
AC113349.1	2.08742	1.45138	3.00219	7.21666e-05
AL049749.1	0.547703	0.418672	0.7165	1.12212e-05
AC079089.1	0.227939	0.107661	0.482591	0.000111668
Z98885.2	0.0491707	0.00462865	0.522346	0.0124679
AC027307.2	1.99213	1.34957	2.94062	0.000522756
AC015908.2	8.17068	2.87395	23.2294	8.14036e-05
LINC01730	3.21709	1.06357	9.731	0.0385361
AC002398.1	1.85572	1.1231	3.06623	0.0158182
LINC02389	0.350771	0.123327	0.997673	0.0494916
AC010457.1	6.37215	1.7382	23.3599	0.00520502
AC095057.3	0.581874	0.350349	0.9664	0.0364381
ARNILA	0.123219	0.0305641	0.496761	0.00324453
AC010729.1	4.53549	2.89373	7.10872	4.27681e-11
AC010226.1	4.16103	2.38858	7.24874	4.79228e-07
AF131215.6	0.454788	0.272591	0.758762	0.00255244
MIAT	0.748743	0.599982	0.934389	0.0104532
AL391684.1	0.292632	0.129797	0.659753	0.00305005
AC022762.2	0.464756	0.243346	0.887618	0.0202823
AL022337.1	0.591737	0.371437	0.942697	0.0272215
AC026585.1	0.216566	0.0573658	0.817572	0.0239999
PAXIP1-AS2	3.69286	2.51076	5.4315	3.2102e-11
CARD8-AS1	3.71691	1.7471	7.90767	0.000653166
AC126407.1	0.640328	0.468324	0.875505	0.00522241
LINC02217	0.561636	0.323655	0.974602	0.0402235
AC016876.1	0.595406	0.407227	0.870544	0.00746705
AL117332.1	4.67265	2.36593	9.22837	8.9923e-06
OSMR-AS1	4.2907	1.77631	10.3642	0.00120868
AC104667.1	0.0248737	0.00282946	0.218664	0.000866314
AC124854.1	0.647813	0.428271	0.979896	0.0397684
AC110015.1	2.89696	1.85375	4.52724	3.01838e-06
AC009812.3	22.136	3.29555	148.687	0.00143666
AC026790.1	0.402004	0.213375	0.757384	0.00480498
AC008915.2	3.65045	1.82296	7.30997	0.000257372
AL021368.2	0.280179	0.123442	0.635926	0.002347
AC108463.2	3.07326	1.84093	5.13052	1.75497e-05
LINC01990	4.01681	1.02465	15.7467	0.0460543
ADGRA1-AS1	0.246515	0.142997	0.424974	4.6644e-07
AL158166.2	9.42436	3.77318	23.5395	1.56128e-06
LINC00339	1.88195	1.09156	3.24465	0.0228933
AC025211.1	0.625065	0.416254	0.938623	0.0234929
AC002470.1	0.337846	0.172346	0.662274	0.00157832
MIR9-3HG	0.502592	0.404583	0.624343	5.09522e-10
AL353751.1	0.265072	0.122493	0.573611	0.00074859
AC093673.1	1.6554	1.26939	2.15879	0.000198548
LINC01842	3.54498	2.30657	5.44832	7.86133e-09
TTC23L-AS1	2.70031	1.40295	5.19738	0.00294494
AL118505.1	0.569951	0.466316	0.696619	4.0054e-08
AC009955.3	0.260716	0.0976487	0.696094	0.00729704
Z94721.1	5.42015	1.36315	21.5515	0.0164013
AC025263.1	0.442404	0.204421	0.957443	0.0384177
AL359091.4	2.87849	1.25056	6.62559	0.0129321
AC013472.2	0.39622	0.222581	0.705318	0.00165253
AC018450.1	5.79675	2.60075	12.9202	1.72918e-05
AL031658.2	0.428089	0.248689	0.736905	0.00220104
TPT1-AS1	0.42262	0.204283	0.874318	0.0202288
AP006623.1	0.464594	0.229525	0.940411	0.0331113
AC008105.1	0.370305	0.163891	0.836688	0.0169083
AL161421.1	2.38497	1.33324	4.26636	0.00339794
AL133481.1	0.0486647	0.0051431	0.460473	0.00838126
CCR5AS	1.8166	1.25513	2.62922	0.00155287
RFPL1S	0.704072	0.539917	0.918135	0.00958196
AL008582.1	0.602173	0.36414	0.995806	0.0481161
MIR4500HG	0.182558	0.0472669	0.70509	0.0136325
LINC02828	1.99433	1.32108	3.01068	0.00101961
AL133410.1	0.476274	0.230174	0.985499	0.0455721
IBA57-DT	0.449744	0.260201	0.77736	0.00420966
HOTAIR	2.55842	1.70307	3.84338	6.06181e-06
SP2-AS1	0.280773	0.117526	0.670776	0.0042545
LINC01537	0.00529685	0.000523041	0.0536414	9.14247e-06
IGF2-AS	1.67622	1.2043	2.33307	0.00219942
AL139349.1	4.72348	1.68727	13.2233	0.00311722
AL157394.1	3.35265	1.40328	8.01001	0.0064805
SUCLG2-AS1	10.8342	2.56347	45.7892	0.00119511
LINC01433	5.64434	1.93548	16.4603	0.00152846
LINC02056	6.69283	2.5487	17.5752	0.000113717
LINC02587	1.93082	1.62776	2.29032	4.26756e-14
SLC16A1-AS1	9.24702	3.29888	25.9201	2.3408e-05
AL589765.6	0.389291	0.209058	0.724903	0.00293767
AL356019.2	0.12921	0.0311776	0.535488	0.00478764
AC139768.1	0.640493	0.412195	0.995236	0.0475689
AL590666.2	0.715817	0.56986	0.899158	0.0040583
AL354919.2	1.59557	1.27882	1.99078	3.50113e-05
USP30-AS1	5.01181	2.37041	10.5966	2.45167e-05
SOCS2-AS1	2.30189	1.64676	3.21765	1.06631e-06
MIR1915HG	1.95068	1.26501	3.008	0.00249605
OLMALINC	0.529924	0.373517	0.751825	0.000373131
PTPRN2-AS1	2.78783	1.37485	5.65297	0.00447483
AC245060.5	0.452045	0.226217	0.903311	0.0245852
LINC00641	0.404771	0.289942	0.565077	1.07795e-07
LINC00943	0.505638	0.297943	0.858115	0.0115047
CD27-AS1	0.51037	0.32663	0.797471	0.00313887
SNHG18	2.53035	1.87486	3.41501	1.28927e-09
LINC02298	0.266456	0.100639	0.705481	0.00776229
HR, hazard ratio; lncRNA, long non-coding RNA.
